# Supplementary material
Source: publisher figshare collection journal article supplement (https://karger.figshare.com/ndownloader/files/11051066)

**Suppl. Fig. 1.** Flow chart of literature searching and selection.


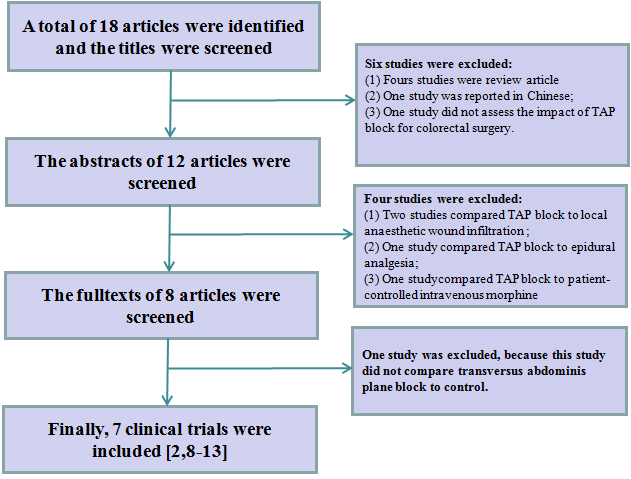

Supplement: Supplementary file 1 [file 11051066]
